# Supplementary material
Source: bioRxiv or medRxiv preprint supplement (https://medrxiv.org/highwire/filestream/97872/field_highwire_adjunct_files/0/2020.09.21.20199109-1.pdf)
Supplement: Supplementary file [file 2020.09.21.20199109-1.pdf]

# **Nature and dimensions of the cytokine storm and its attenuation by convalescent plasma in severe COVID-19**

Bandopadhyay P et al.

**Extended data figures with legends**

A

Patient characteristics.

| Group         | N  | Age (Years)<br>(Mean $\pm$ SD) | Male | Female | Admission to enrolment<br>(Days, Mean $\pm$ SD) |
|---------------|----|--------------------------------|------|--------|-------------------------------------------------|
| Mild Covid-19 | 13 | 41.1 $\pm$ 11.2                | 12   | 1      | 2.5 $\pm$ 2                                     |
| ARDS          | 33 | 60.03 $\pm$ 11.5               | 26   | 7      | 4 $\pm$ 2.8                                     |

B

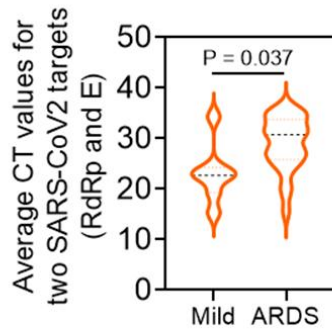

Extended Data Figure 1

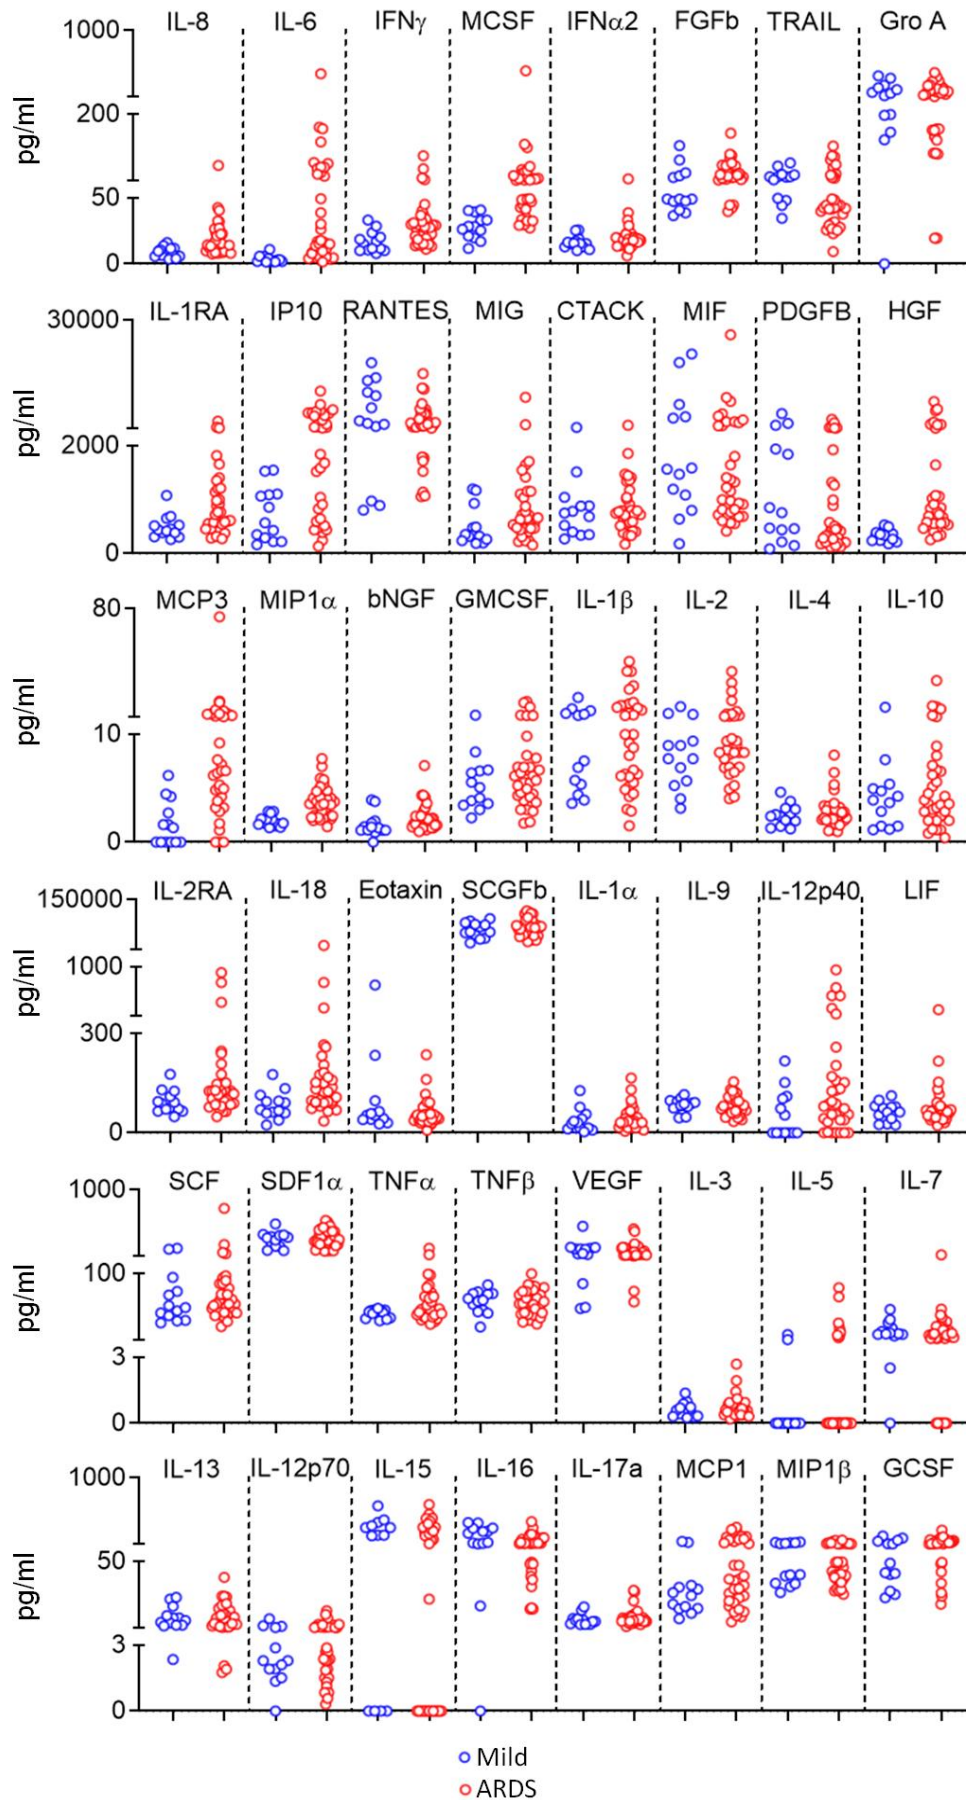

| Name        | Z        | P value  |
|-------------|----------|----------|
| b-NGF       | -2.55116 | 0.010737 |
| CTACK       | -0.34154 | 0.732698 |
| Eotaxin     | 0.80506  | 0.420787 |
| FGF basic   | -2.13508 | 0.032755 |
| G-CSF       | -1.56132 | 0.118448 |
| GM-CSF      | -1.08618 | 0.277401 |
| GRO-a       | 0.07319  | 0.941652 |
| HGF         | -4.46441 | 0.000008 |
| IFN-a2      | -1.84267 | 0.065378 |
| IFN-g       | -3.13562 | 0.001715 |
| IL-1a       | -1.22186 | 0.221762 |
| IL-1b       | -0.80511 | 0.420758 |
| IL-1ra      | -2.76925 | 0.005619 |
| IL-2        | -0.90334 | 0.366348 |
| IL-2Ra      | -2.19615 | 0.028082 |
| IL-3        | -0.68363 | 0.494211 |
| IL-4        | -0.54900 | 0.583003 |
| IL-5        | -0.79440 | 0.426963 |
| IL-6        | -4.41603 | 0.000010 |
| IL-7        | 0.68503  | 0.493328 |
| IL-8        | -3.40330 | 0.000666 |
| IL-9        | 0.34156  | 0.732682 |
| IL-10       | -0.56129 | 0.574599 |
| IL-12(p70)  | -0.87928 | 0.379253 |
| IL-12(p40)  | -1.99905 | 0.045604 |
| IL-13       | 0.20741  | 0.835691 |
| IL-15       | 0.73871  | 0.460083 |
| IL-16       | 1.41504  | 0.157059 |
| IL-17A      | -1.39176 | 0.163997 |
| IL-18       | -2.90309 | 0.003695 |
| IP-10       | -3.04946 | 0.002293 |
| LIF         | -0.04880 | 0.961076 |
| M-CSF       | -4.41576 | 0.000010 |
| MCP-1(MCAF) | -1.81759 | 0.069128 |
| MCP-3       | -3.77197 | 0.000162 |
| MIF         | 0.95143  | 0.341386 |
| MIG         | -2.09816 | 0.035892 |
| MIP-1a      | -4.05031 | 0.000051 |
| MIP-1b      | 0.14637  | 0.883626 |
| PDGF-bb     | 1.00025  | 0.317188 |
| RANTES      | 0.90264  | 0.366717 |
| SCF         | -0.73198 | 0.464179 |
| SCGF-b      | -1.07341 | 0.283088 |
| SDF-1a      | -0.41473 | 0.678342 |
| TNF-a       | -1.50043 | 0.133505 |
| TNF-b       | 0.36595  | 0.714405 |
| TRAIL       | 1.97629  | 0.048122 |
| VEGF        | 0.30507  | 0.760314 |

Extended Data Figure 2

A

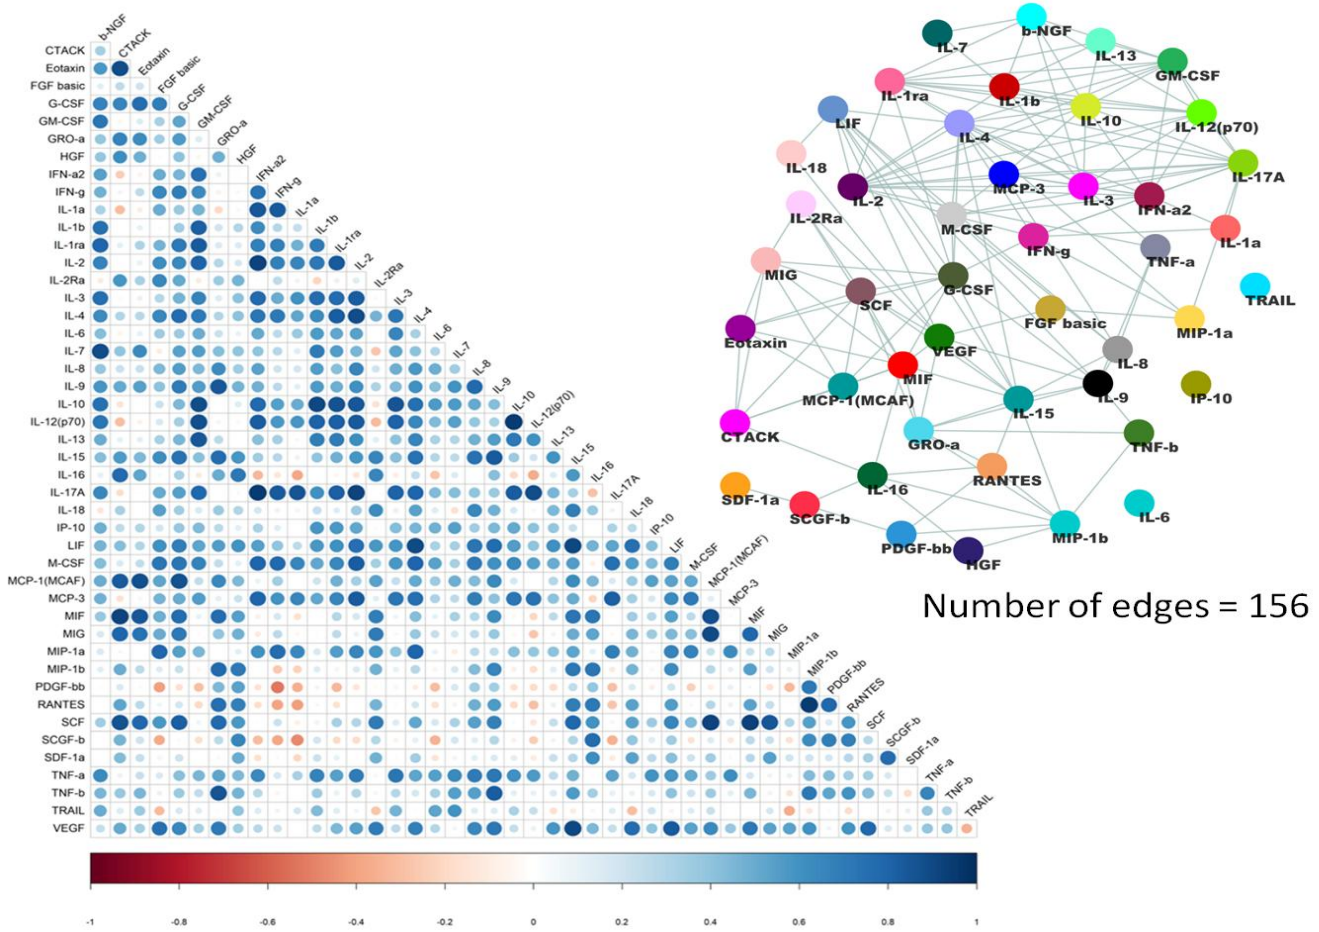

B

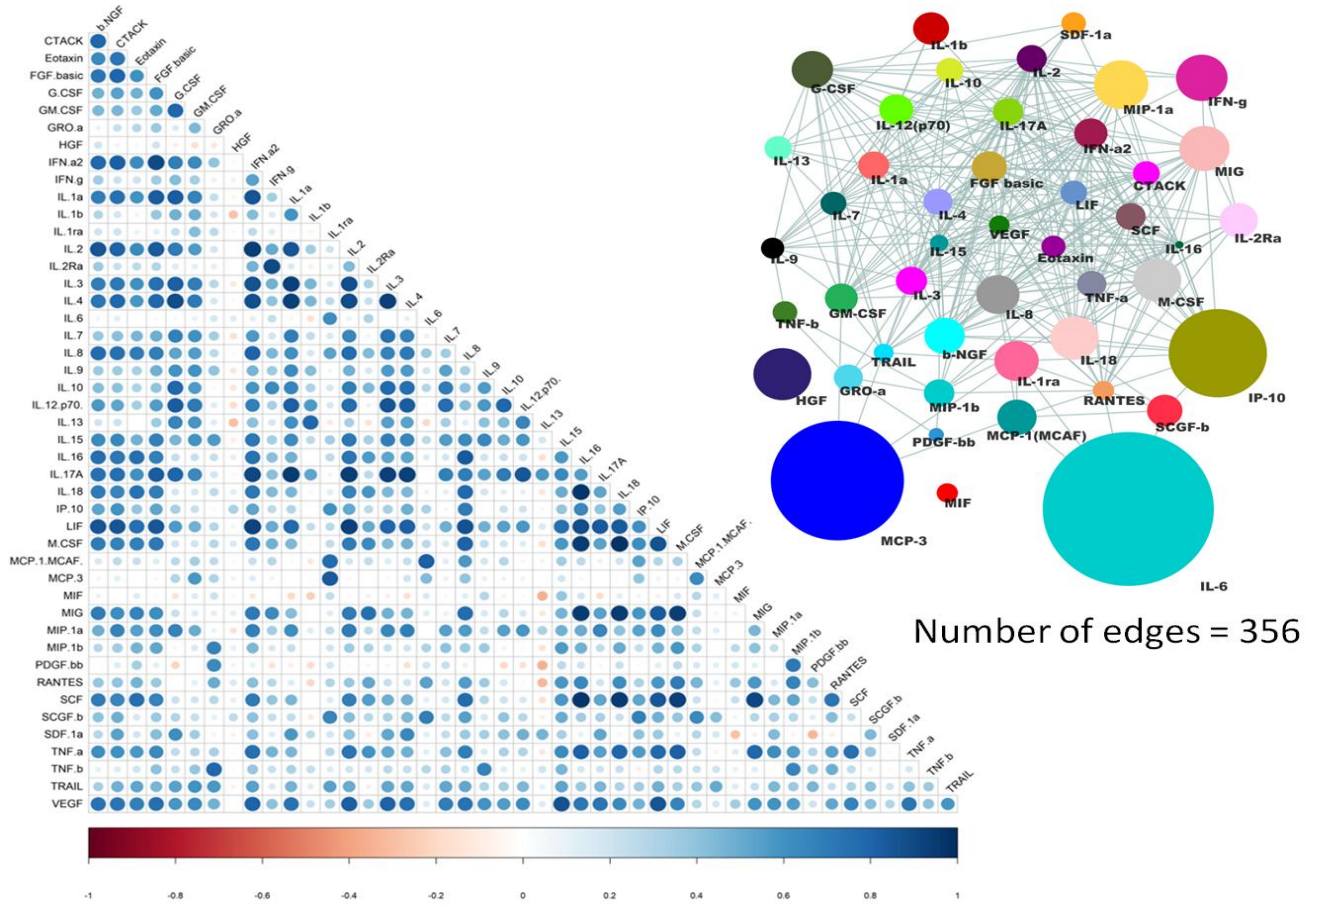

Extended Data Figure 3

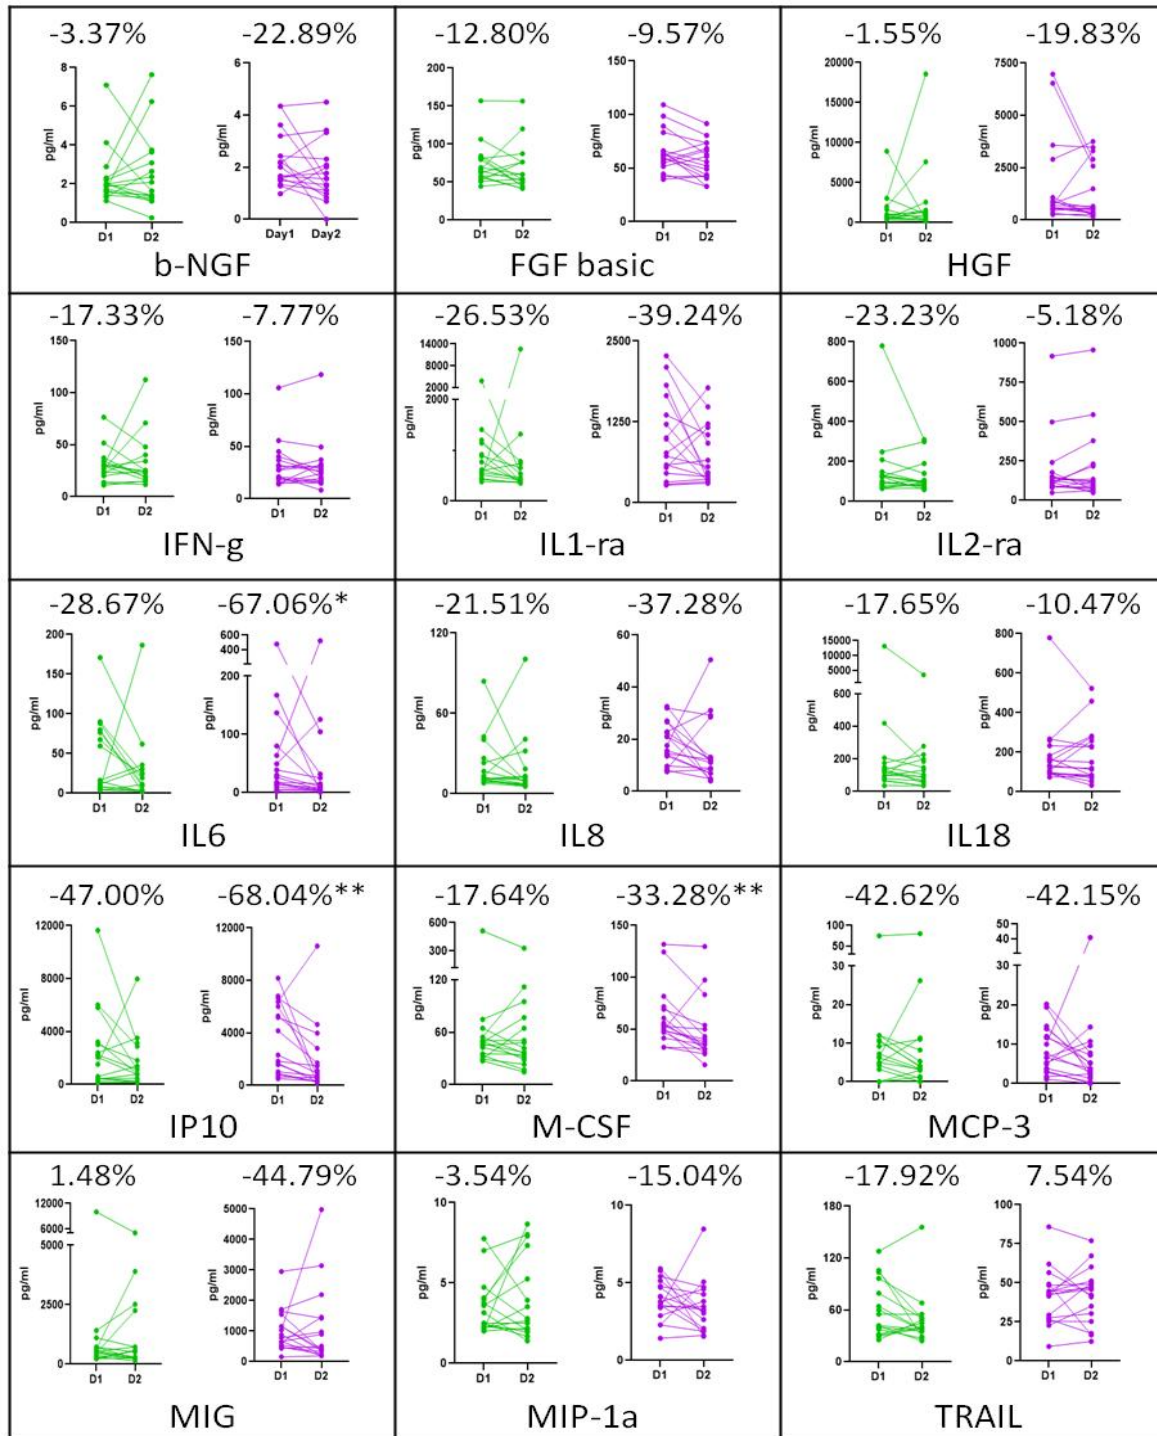

\* P < 0.05

\*\* P < 0.01

Extended Data Figure 4

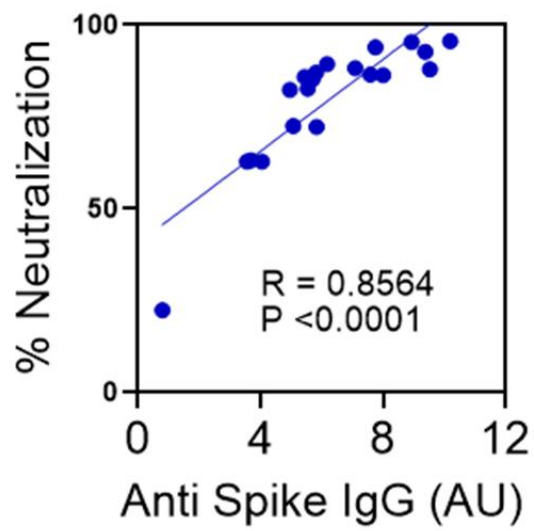

Extended Data Figure 5

A

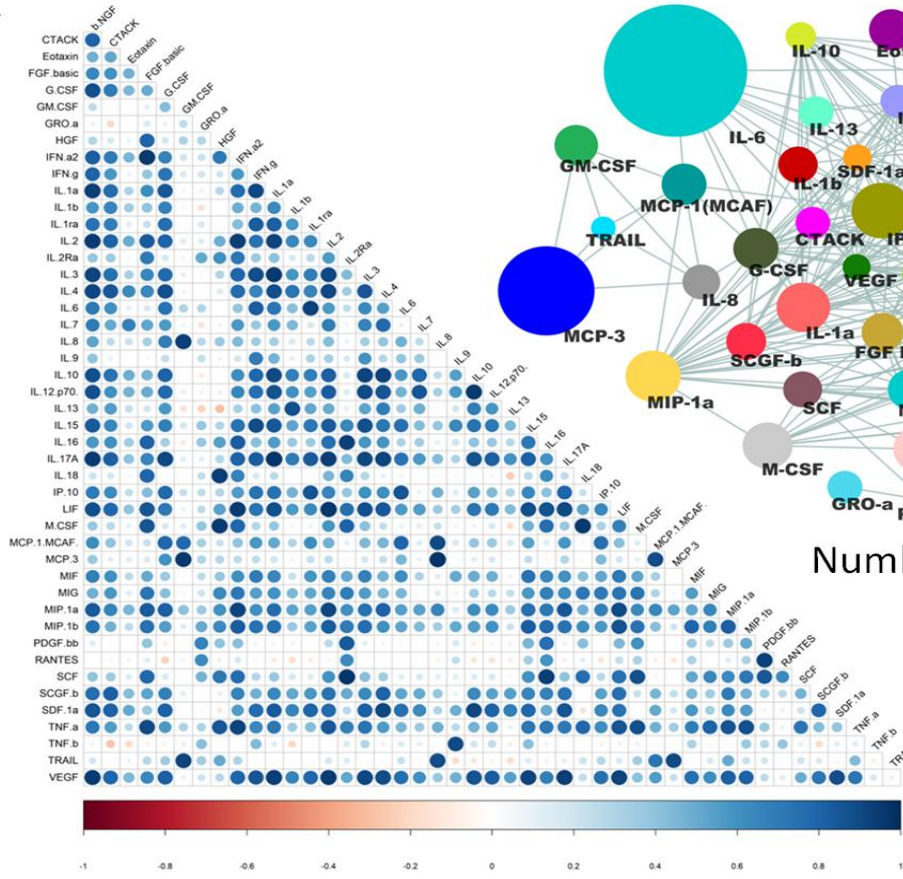

Number of edges = 334

B

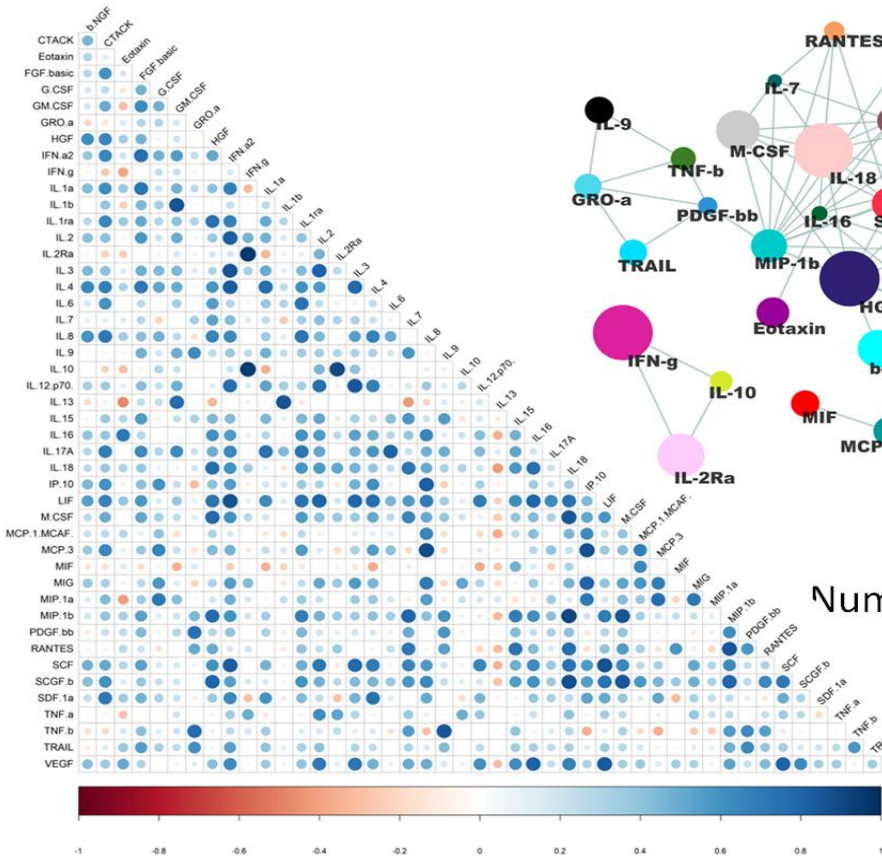

Number of edges = 135

Extended Data Figure 6

A

| Linear Regression Formula                | R <sup>2</sup> | Adjusted R <sup>2</sup> | F statistic | p-value |
|------------------------------------------|----------------|-------------------------|-------------|---------|
| SPR <sub>5D</sub> AUC ~ nAb              | 0.3303         | 0.2787                  | 6.411       | 0.02503 |
| SPR <sub>5D</sub> AUC ~ IP10 + IL6 + nAb | 0.5543         | 0.4328                  | 4.56        | 0.02612 |

| Coefficients for SPR <sub>5D</sub> AUC ~ IP10 + IL6 + nAb |          |            |         |           |
|-----------------------------------------------------------|----------|------------|---------|-----------|
|                                                           | Estimate | Std. Error | t value | Pr(>  t ) |
| (Intercept)                                               | 7.0825   | 2.6114     | 2.712   | 0.0202 *  |
| IP10                                                      | -0.1035  | 0.2867     | -0.361  | 0.7251    |
| IL6                                                       | -0.4297  | 0.2877     | -1.494  | 0.1633    |
| nAb                                                       | 0.6334   | 0.2107     | 3.007   | 0.0119 *  |

B

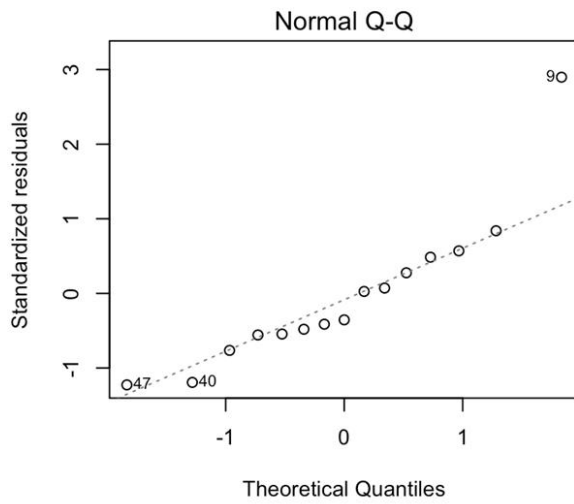

Extended Data Figure 7



### **Legends for Extended Data Figures:**

Extended Data Figure 1: **A.** Patient characteristics of subjects recruited in the study. **B.** Violin plot representing viral load of SARS-CoV2 across mild and ARDS sample groups.

**Extended Data Figure 2:** Panel of 48 cytokines measured across ARDS and mild samples . Blue dots represent MILD and red dots represent ARDS samples. The Z value and P value for Mann-Whitney U Test are given in the adjacent table.

**Extended Data Figure 3: A.** Left panel describes the correlation matrix for systemic levels of all cytokines at T1 whereas right panel describes the correlation network with r threshold set at 0.5 and P threshold at 0.01 for mild state. **B.** Left panel describes the correlation matrix for systemic levels of all cytokines at T1 whereas right panel describes the correlation network with r threshold set at 0.5 and P threshold at 0.01 for ARDS state.

**Extended Data Figure 4:** The plot describes the change in the systemic level of 15 significantly differential cytokines between mild and ARDS conditions in SCO and CPT patients from T1 to T2. The percentage difference of median value at T2 time point in compare to T1 was also calculated for each of the cytokines.

**Extended Data Figure 5:** The plot depicts the pearson correlation between anti-spike IgG content of plasma and its capacity to neutralize spike-ACE2 interaction, as measured in an in vitro assay, in our cohort of convalescent donors.

**Extended Data Figure 6: A.** Left panel describes the correlation matrix for systemic levels of all cytokines at T2 whereas right panel describes the correlation network with r threshold set at 0.5 and P threshold at 0.01 for SOC state. **B.** Left panel describes the correlation matrix for systemic levels of all cytokines at T2 whereas right panel describes the correlation network with r threshold set at 0.5 and P threshold at 0.01 for CPT state.

**Extended Data Figure 7: A.** Summary of the linear regression analysis using R. **B.** The Q-Q plot between theoretical quantiles of  $\ln(\text{SPR5D AUC} \sim \text{IL6} + \text{IP10} + \text{nAb})$  and standardised residuals explain that residuals follow a normal distribution and thus the model has low error.
